# Supplementary material
Source: Springer Nature journal article supplement (https://www.springermedizin.de/resource/supplementary/12939_2013_427_MOESM3_ESM.pdf/9551238)

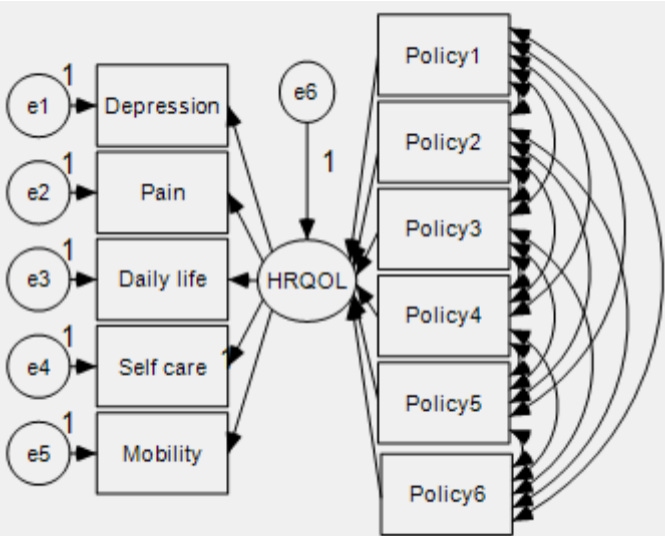

Supplement: MOESM3 [file 9551238]
